# Supplementary material for: TAZ inhibits glucocorticoid receptor and coordinates hepatic glucose homeostasis in normal physiological states
Source: eLife journal article supplement (doi:10.7554/elife.57462), 2021-10-06
Supplement: supp [file elife_poa_e57462_Figure_5_figure_supplement_2.pdf › elife_poa_e57462_Figure_5_figure_supplement_2.pdf]

# Figure 5—Figure supplement 2

|                                |                                 |
|--------------------------------|---------------------------------|
| Homo sapiens (human)           | IITNQ <b>IPKY</b> SNGNIKKLLFHQK |
| Mus musculus (house mouse)     | IITNQ <b>IPKY</b> SNGNIKKLLFHQK |
| Rattus norvegicus (norway rat) | IITNQ <b>IPKY</b> SNGNIKKLLFHQK |
| Pan troglodytes (chimpanzee)   | IITNQ <b>IPKY</b> SNGNIKKLLFHQK |
| Macaca mulatta (rhesus monkey) | IITNQ <b>IPKY</b> SNGNIKKLLFHQK |
| Callithrix jacchus (marmoset)  | IITNQ <b>IPKY</b> SSGNIKKLLFHQK |
| Bos taurus (cattle)            | IITNQ <b>IPKY</b> SSGNIKKLLFHQK |
| Canis lupus familiaris (dog)   | IITNQ <b>IPKY</b> SSGNIKKLLFHQK |
| Sus scrofa (pig)               | IITNQ <b>LPKY</b> SSGNIKKLLFHQK |
| Ovis aries (sheep)             | IITNQ <b>LPKY</b> SNGNIKKLLFHQK |
