# Supplementary figures and images for: TAZ inhibits glucocorticoid receptor and coordinates hepatic glucose homeostasis in normal physiological states
Source: eLife journal article supplement (doi:10.7554/elife.57462), 2021-10-06

Figure 1–Figure supplement 1

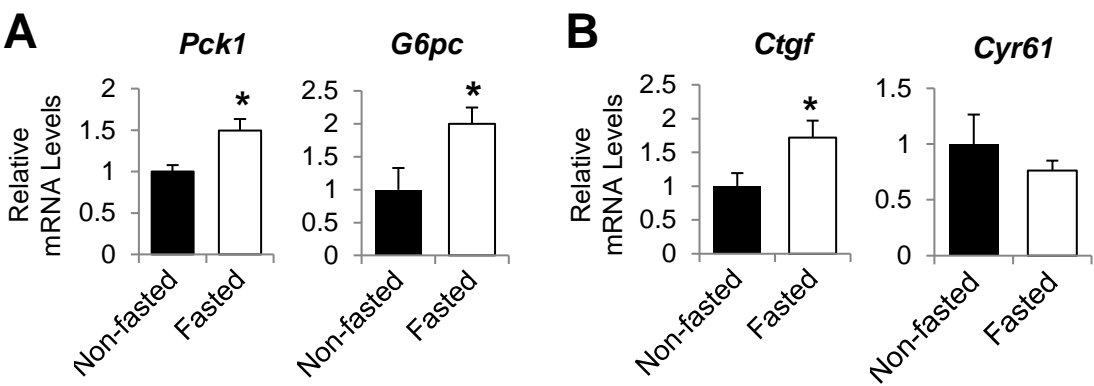

Supplement: supp [file elife_poa_e57462_Figure_1_figure_supplement_1.pdf › elife_poa_e57462_Figure_1_figure_supplement_1.pdf]

**Figure 1–Figure supplement 2**

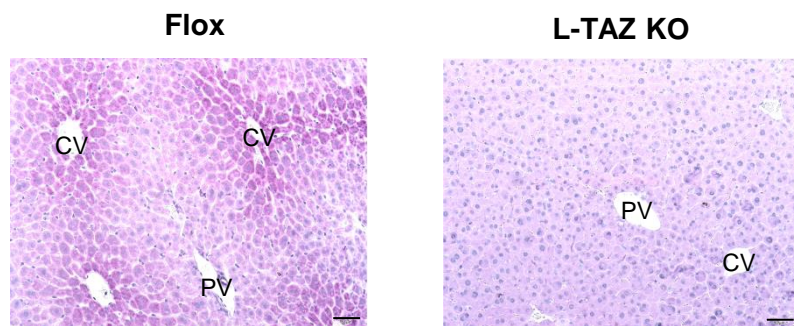

Supplement: supp [file elife_poa_e57462_Figure_1_figure_supplement_2.pdf › elife_poa_e57462_Figure_1_figure_supplement_2.pdf]

Figure 1–Figure supplement 3

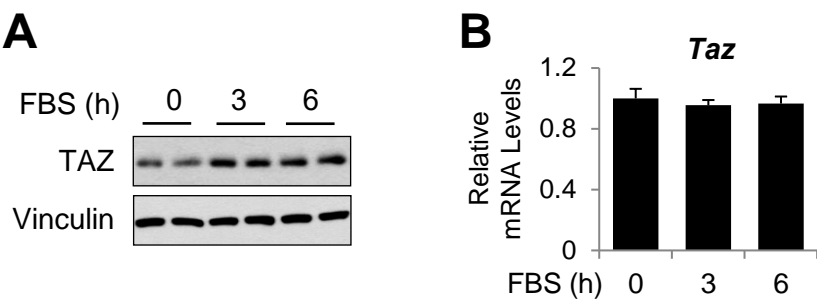

Supplement: supp [file elife_poa_e57462_Figure_1_figure_supplement_3.pdf › elife_poa_e57462_Figure_1_figure_supplement_3.pdf]

Figure 2–Figure supplement 1

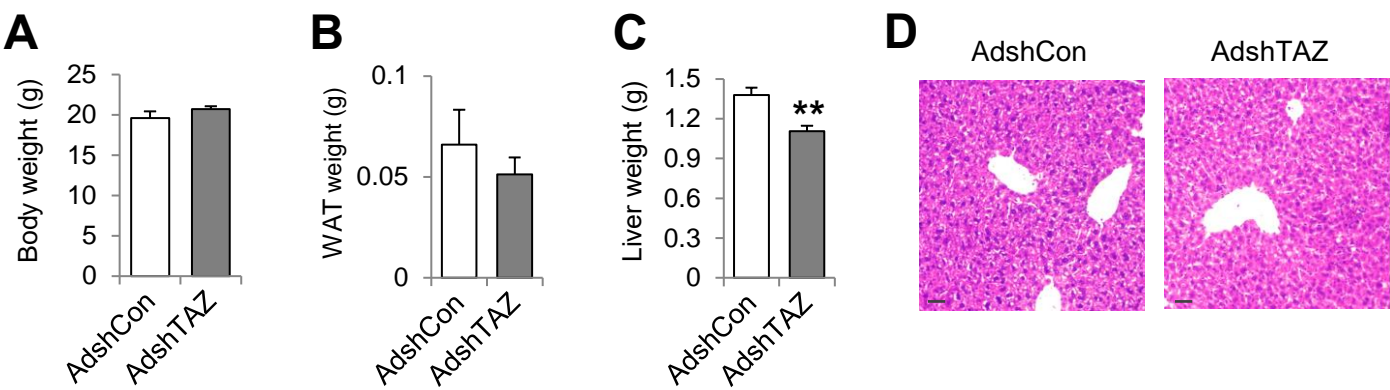

Supplement: supp [file elife_poa_e57462_Figure_2_figure_supplement_1.pdf › elife_poa_e57462_Figure_2_figure_supplement_1.pdf]

Figure 2–Figure supplement 2

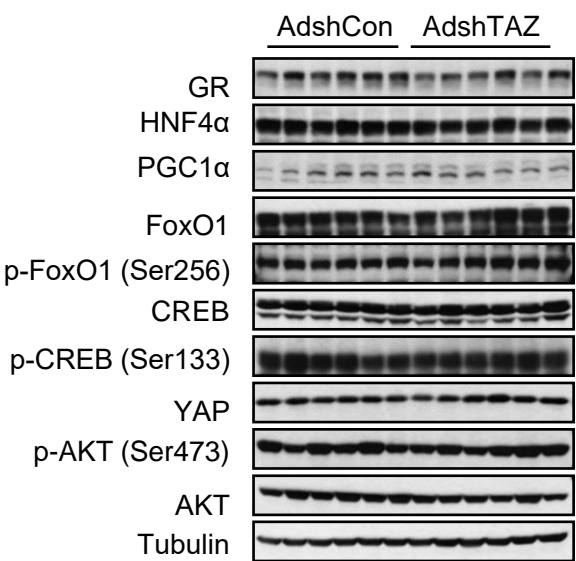

Supplement: supp [file elife_poa_e57462_Figure_2_figure_supplement_2.pdf › elife_poa_e57462_Figure_2_figure_supplement_2.pdf]

Figure 2–Figure supplement 3

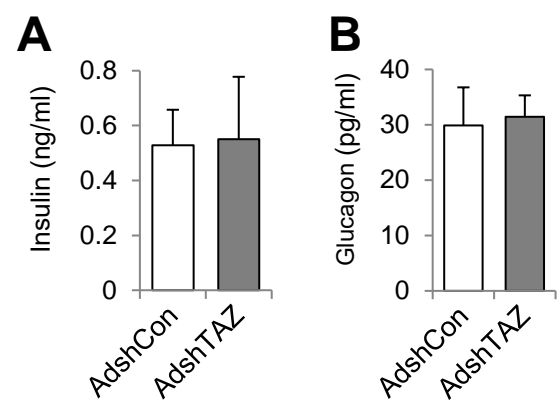

Supplement: supp [file elife_poa_e57462_Figure_2_figure_supplement_3.pdf › elife_poa_e57462_Figure_2_figure_supplement_3.pdf]

Figure 2–Figure supplement 4

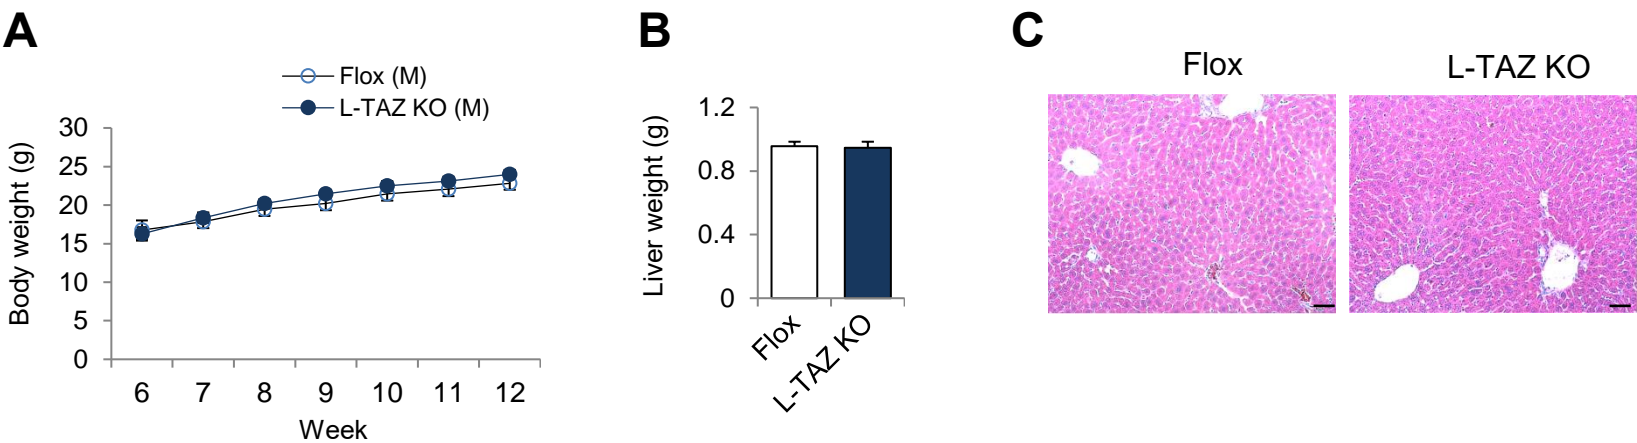

Supplement: supp [file elife_poa_e57462_Figure_2_figure_supplement_4.pdf › elife_poa_e57462_Figure_2_figure_supplement_4.pdf]

Figure 2–Figure supplement 5

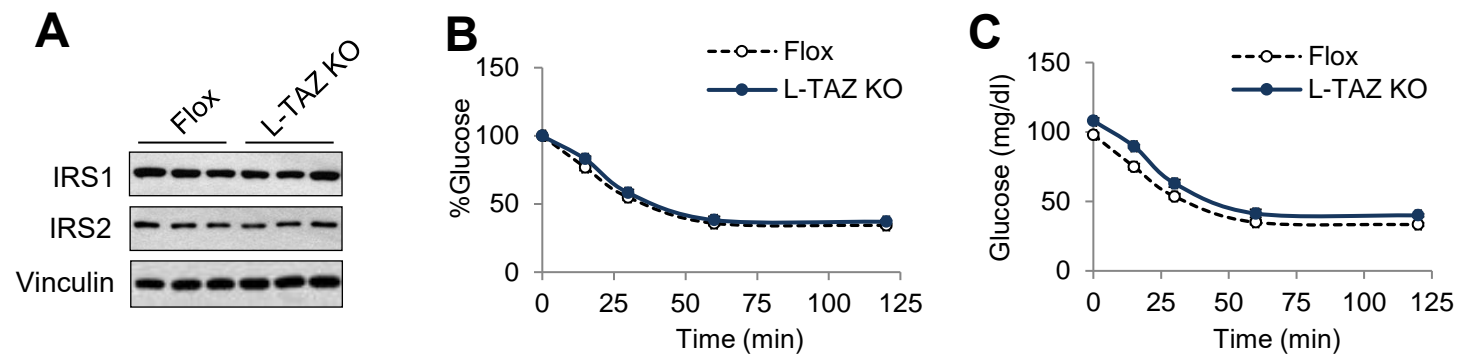

Supplement: supp [file elife_poa_e57462_Figure_2_figure_supplement_5.pdf › elife_poa_e57462_Figure_2_figure_supplement_5.pdf]

# Figure 3—Figure supplement 1

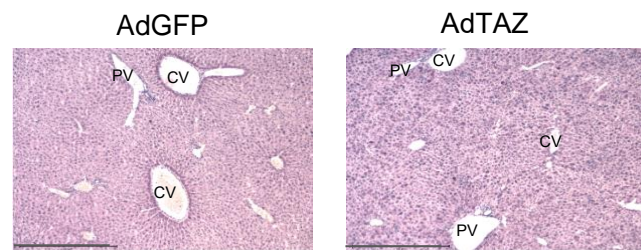

Supplement: supp [file elife_poa_e57462_Figure_3_figure_supplement_1.pdf › elife_poa_e57462_Figure_3_figure_supplement_1.pdf]

Figure 3–Figure supplement 2

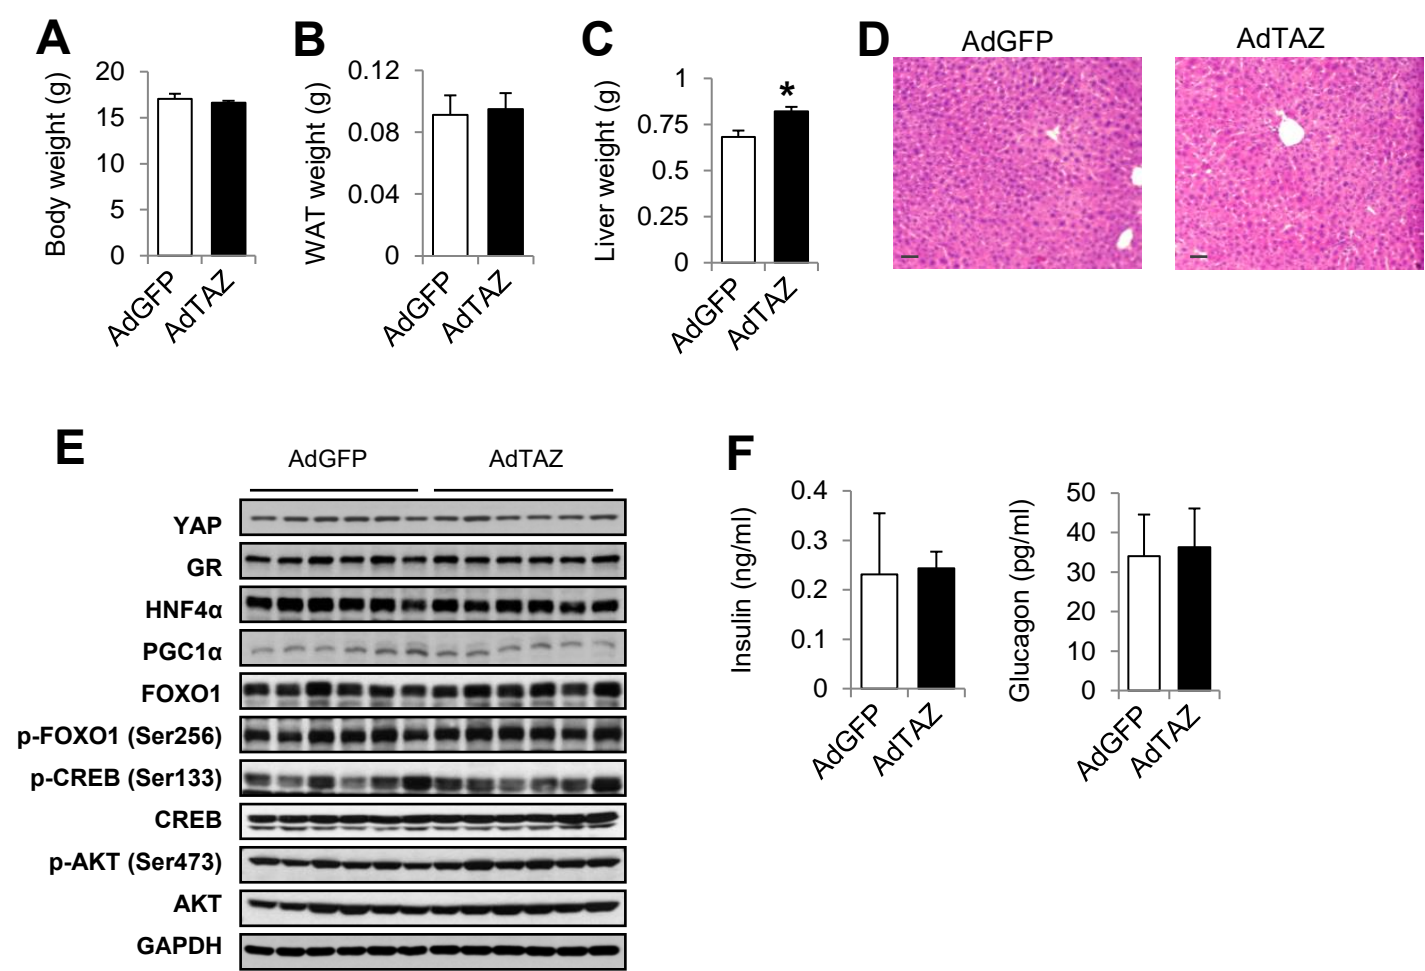

Supplement: supp [file elife_poa_e57462_Figure_3_figure_supplement_2.pdf › elife_poa_e57462_Figure_3_figure_supplement_2.pdf]

Figure 4—Figure supplement 1

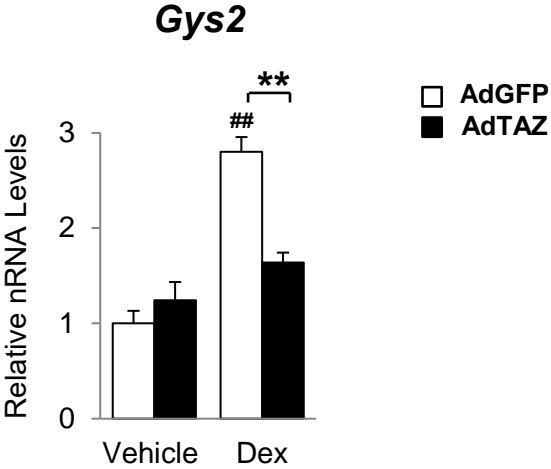

Supplement: supp [file elife_poa_e57462_Figure_4_figure_supplement_1.pdf › elife_poa_e57462_Figure_4_figure_supplement_1.pdf]

Figure 4—Figure supplement 2

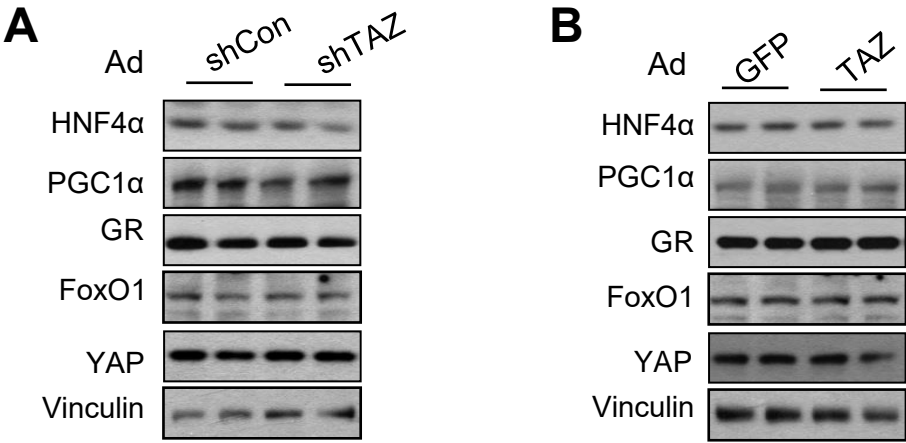

Supplement: supp [file elife_poa_e57462_Figure_4_figure_supplement_2.pdf › elife_poa_e57462_Figure_4_figure_supplement_2.pdf]

Figure 4—Figure supplement 3

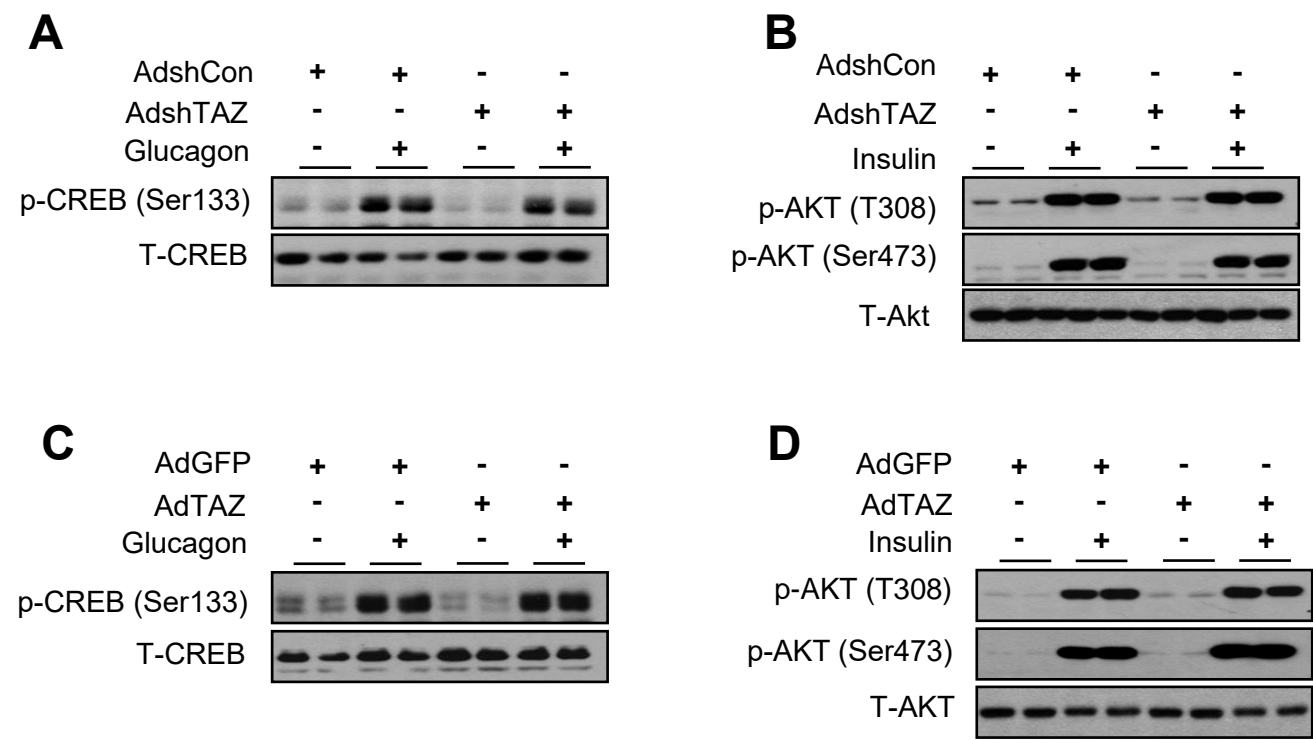

Supplement: supp [file elife_poa_e57462_Figure_4_figure_supplement_3.pdf › elife_poa_e57462_Figure_4_figure_supplement_3.pdf]

Figure 5–Figure supplement 1

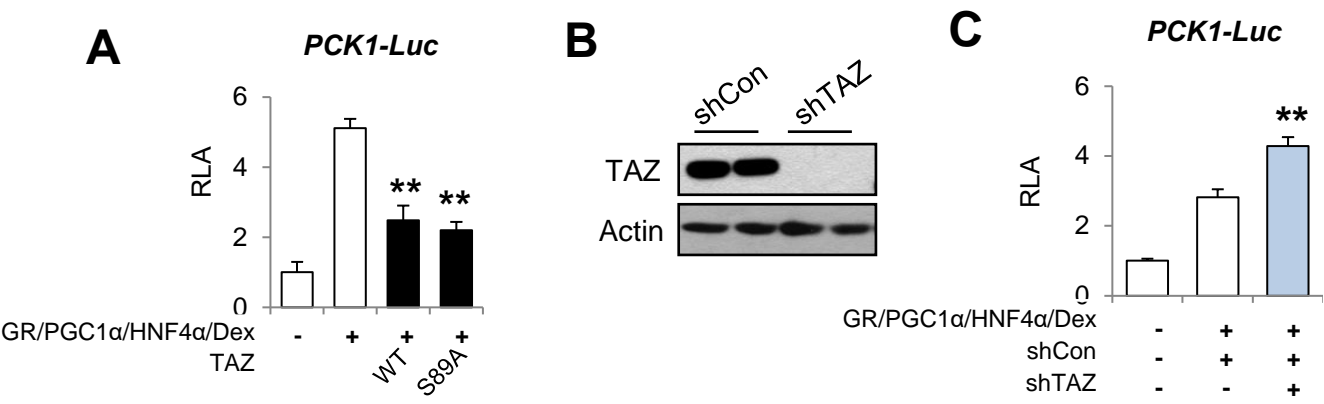

Supplement: supp [file elife_poa_e57462_Figure_5_figure_supplement_1.pdf › elife_poa_e57462_Figure_5_figure_supplement_1.pdf]

Figure 5—Figure supplement 3

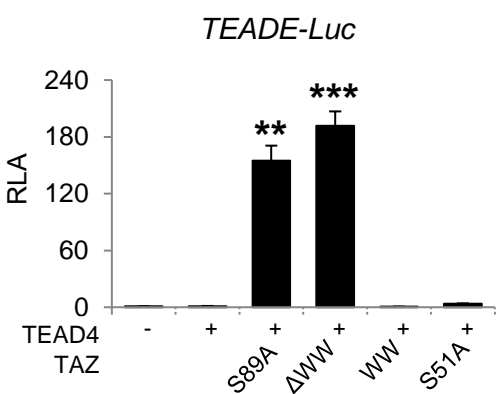

Supplement: supp [file elife_poa_e57462_Figure_5_figure_supplement_3.pdf › elife_poa_e57462_Figure_5_figure_supplement_3.pdf]

Figure 5—Figure supplement 4

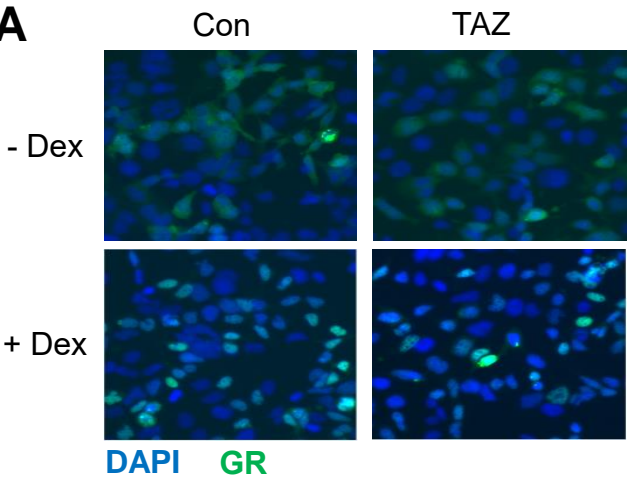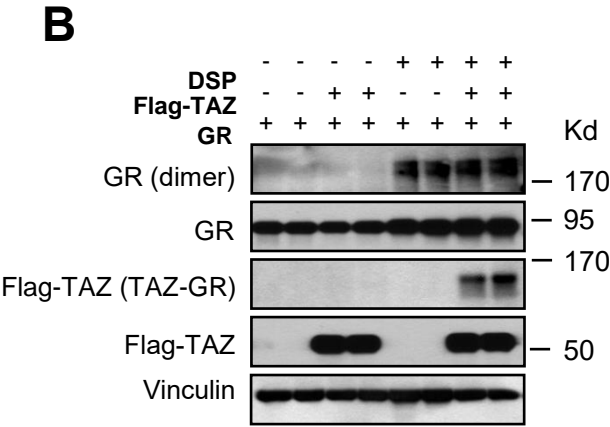

Supplement: supp [file elife_poa_e57462_Figure_5_figure_supplement_4.pdf › elife_poa_e57462_Figure_5_figure_supplement_4.pdf]

Figure 6—Figure supplement 1

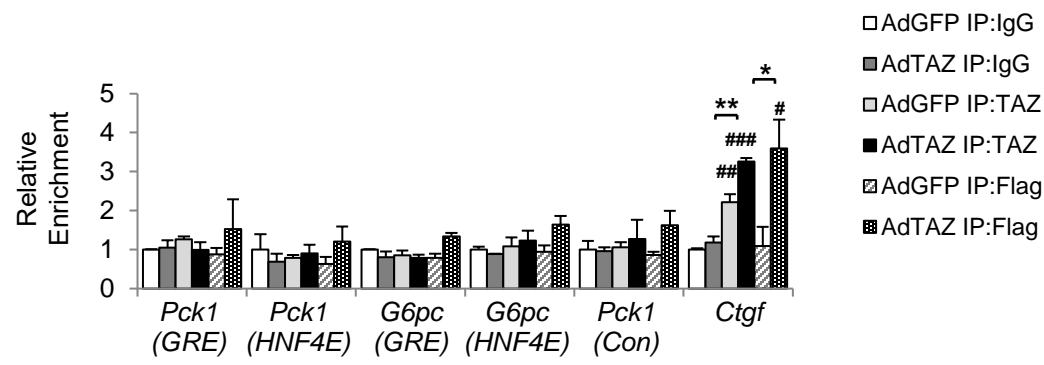

Supplement: supp [file elife_poa_e57462_Figure_6_figure_supplement_1.pdf › elife_poa_e57462_Figure_6_figure_supplement_1.pdf]

Figure 7–Figure supplement 1

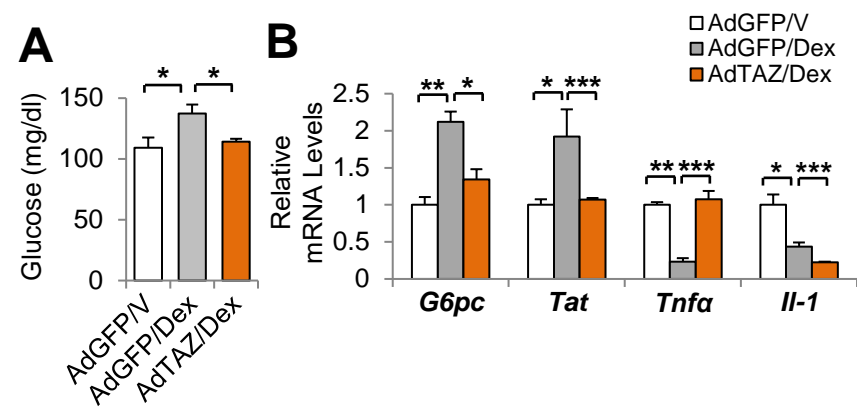

Supplement: supp [file elife_poa_e57462_Figure_7_figure_supplement_1.pdf › elife_poa_e57462_Figure_7_figure_supplement_1.pdf]

Figure 7–Figure supplement 2

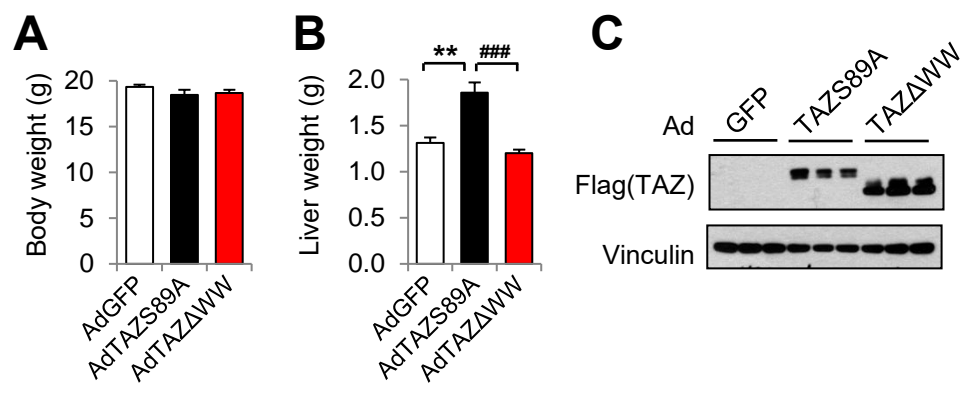

Supplement: supp [file elife_poa_e57462_Figure_7_figure_supplement_2.pdf › elife_poa_e57462_Figure_7_figure_supplement_2.pdf]

Figure 8—Figure supplement 1

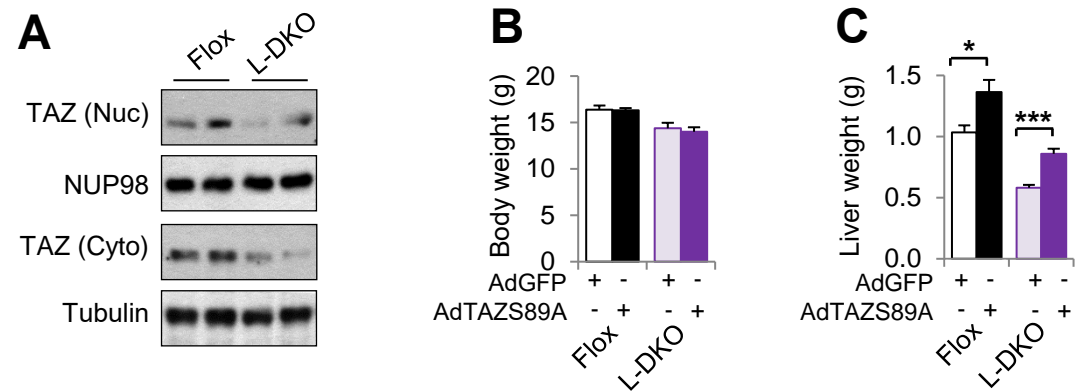

Supplement: supp [file elife_poa_e57462_Figure_8_figure_supplement_1.pdf › elife_poa_e57462_Figure_8_figure_supplement_1.pdf]
